# Supplementary material for: Development of highly sensitive and selective molecules for detection of spermidine and spermine
Source: Royal Society of Chemistry journal article supplement (doi:10.1039/b909682e), 2009-01-01

## Supplementary Material

Development of highly sensitive and selective molecules for detection of spermidine  
and spermine.

Daisuke Tanima,<sup>1</sup> Yoko Imamura,<sup>1</sup> Takeo Kawabata,<sup>1</sup> Kazunori Tsubaki,<sup>2\*</sup>

- 1 Institute for Chemical Research, Kyoto University. *Gokasho, Uji, Kyoto 611-0011, Japan.*
- 2 Graduate School of Life and Environmental Science, Kyoto Prefectural University. *Shimogamo, Sakyo-ku, Kyoto 606-8522, Japan;*

E-mail: tsubaki@kpu.ac.jp

Page 2. Figure S1. X-Ray crystallographic analysis of compound **21**.

Page 3. Figure S2. Job's plot between host **5** and spermidine (**9**) and spermine (**10**).

Page 4. Figure S3. Detection sensitivities of hosts **2**, **5**, and **8**.

Page 5. Figure S4. Fluorescence spectra of host **5** and spermidine (**9**).

Pages 6-11. Experimental Section

Pages 12-25. <sup>1</sup>H-NMR charts for new compounds.

### X-Ray crystallographic analysis of [21·2MeOH].

The intensity data were collected on a Rigaku/MSM Mercury CCD diffractometer with graphite monochromated MoK $\alpha$  radiation ( $\lambda = 0.71069 \text{ \AA}$ ). Single crystals suitable for X-ray analysis were obtained by slow recrystallization from MeOH at room temperature. A colorless crystal ( $0.10 \times 0.10 \times 0.02 \text{ mm}^3$ ) of [21·2MeOH] was mounted on a glass fiber. The structure was solved by a direct method (SIR-97<sup>S1</sup>) and refined by full-matrix least-squares procedures on  $F^2$  for all reflections (SHELXL-97<sup>S2</sup>). Crystallographic data (excluding structure factors) for the structure reported in this paper have been deposited with the Cambridge Crystallographic Data Centre as supplementary publication no. **CCDC 669857**. Copies of the data can be obtained free of charge on application to CCDC, 12 Union Road, Cambridge CB21EZ, UK (fax: (+44)1223-336-033; E-mail: deposit@ccdc.cam.ac.uk.).

Crystal data for 21·2MeOH: C<sub>49</sub>H<sub>65</sub>F<sub>3</sub>O<sub>16</sub>,  $M = 967.01$ , monoclinic,  $a = 16.2859(2)$ ,  $b = 18.5760(4)$ ,  $c = 17.0941(3) \text{ \AA}$ ,  $\beta = 107.1049(8)^\circ$ ,  $V = 4942.68(15) \text{ \AA}^3$ , space group  $P2_1/a$  (#14),  $Z = 4$ ,  $D = 1.300 \text{ g/cm}^3$ , Mo-K $\alpha$  ( $\lambda = 0.71070 \text{ \AA}$ ,  $T = 93 \text{ K}$ ), measured reflections = 42593. Structure solution by SIR-97, refinement by full-matrix least-squares using all reflections (SHELXL-97),  $R = 0.0475$  [ $|F_o| > 2r(F_o)$ ],  $R_w = 0.119$  (all reflections), GOF = 1.061.

- S1. Altomare, A., Burla, M., Camalli, M., Cascarano, G., Giacovazzo, C., Guagliardi, A., Moliterni, A., Polidori, G. & Spagna, R. 1999 *J. Appl. Cryst.* **32**, 115-119.  
S2. Sheldrick, G.M. 1997 SHELX-97, Program for the Refinement of Crystal Structures; University of Göttingen, Germany.

**Figure S1.** Structure of compound 21·2MeOH.

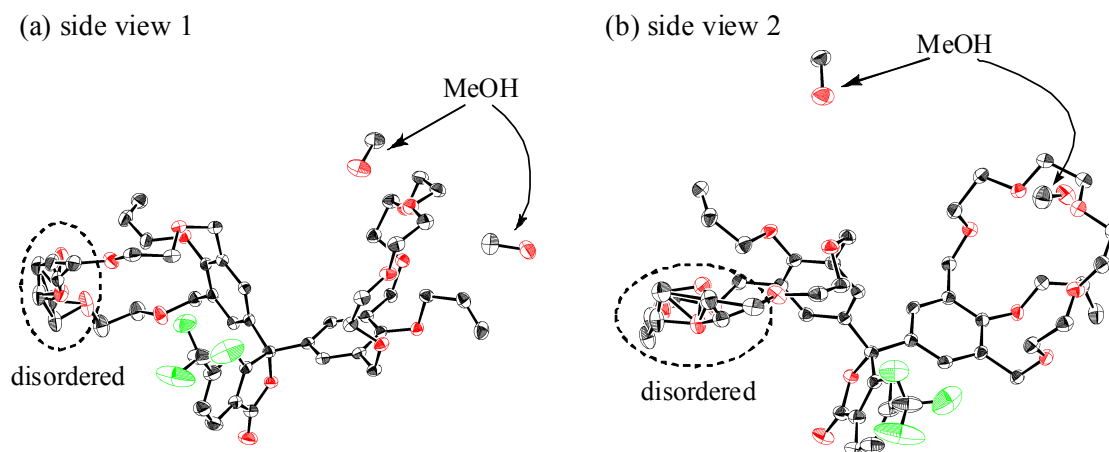

Displacement ellipsoids are scaled to the 50% probability level.

**Figure S2.** Job's plot between host **5** and spermidine (**9**) and spermine (**10**).

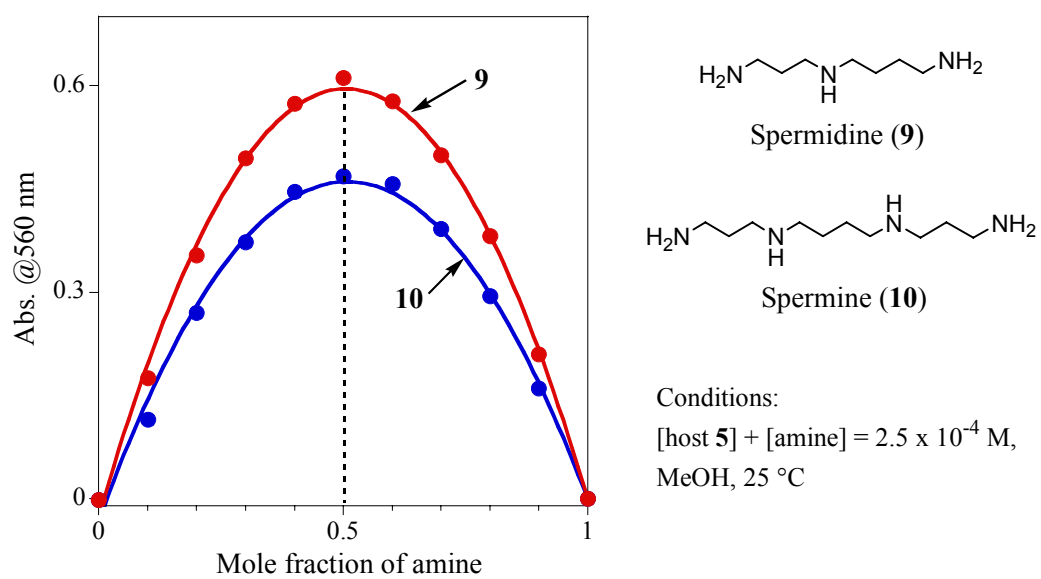

**Figure S3.** Detection sensitivities of hosts **2**, **5**, and **8**.

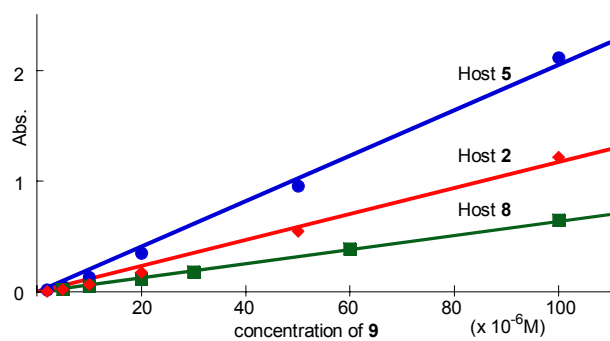

Conditions: [host **2**] =  $5.0 \times 10^{-4}$  M, [host **5**] =  $1.0 \times 10^{-3}$  M, [host **8**] =  $2.0 \times 10^{-4}$  M, 25 °C, Methanol, light path length = 1 cm.



**Figure S4.** Fluorescence spectra of host **5** and spermidine (**9**).

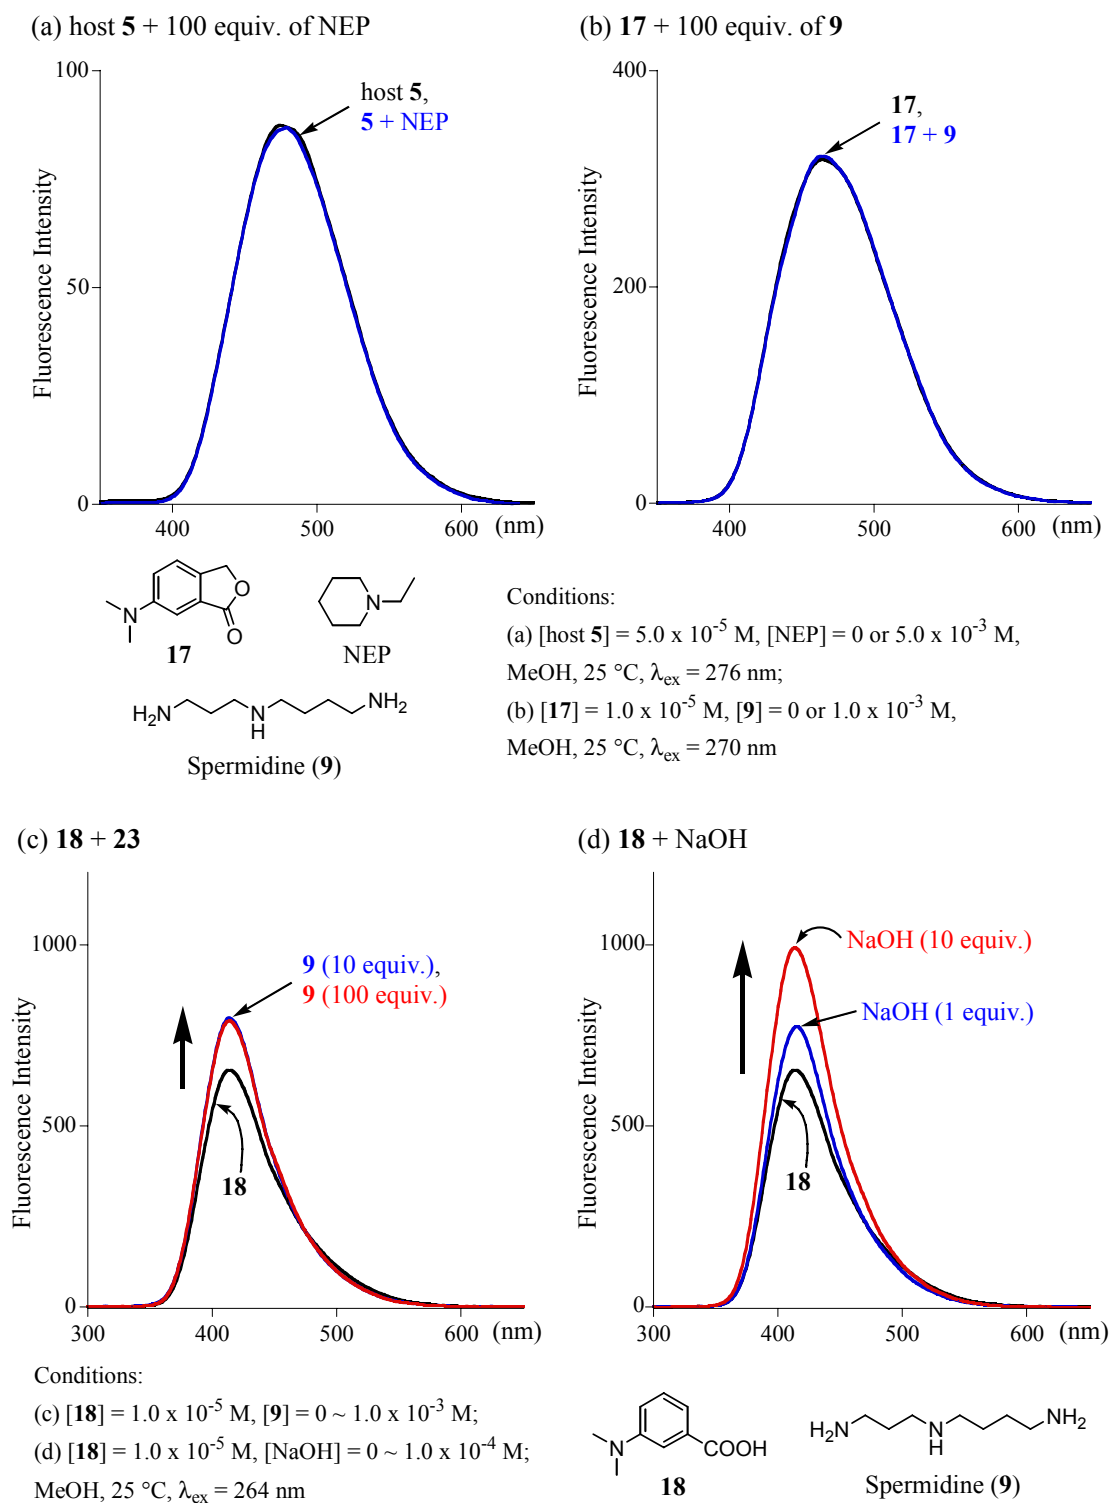

## Experimental Section

### Generals:

All solvents and reagents were purchased commercially and used without further purification unless otherwise mentioned. Air and moisture sensitive reactions were conducted in heat gun-dried glassware sealed with rubber septa under a positive pressure of nitrogen or argon. Dry tetrahydrofuran (THF), *N, N*-dimethylformamide (DMF) and acetic anhydride (Ac<sub>2</sub>O) were freshly distilled just before use from sodium benzophenone ketyl (THF), P<sub>2</sub>O<sub>5</sub> (DMF) or CaH<sub>2</sub> (Ac<sub>2</sub>O). Molecular sieves were activated for 2 minutes (500 W) by kitchen microwave (Panasonic, NE-AT70) followed by cooling *in vacuo*, and these operation were repeated twice.

Reactions were monitored by thin-layer chromatography (TLC) carried out on 0.25 mm silica gel 60 F<sub>254</sub> (0.25 mm, Merck) and were visualized by one or a combination of the following methods: (a) viewing under UV light, (b) exposure to iodine vapor, (c) exposure to 5% ethanolic phosphomolybdic acid solution, and (d) gentle heating on a hot plate. Preparative thin-layer chromatography (PTLC) separations were carried out on silica gel 60 F<sub>254</sub> (0.5 mm, Merck), Wakogel C-200 (100-200 mesh, Wako Pure Chemical Industries Ltd.) or Silica Gel 60N (63-210 μm, Kanto Chemical Co., Inc.) was used for column chromatography. Silica Gel 60 Spherical (150-230 mesh, Nacalai tesque) or UltraPure Silica Gel (230–400 mesh, SiliCycle) was used for flash column chromatography. Recyclable HPLC was performed on LC-908 (Japan Analytical Industry Co., Ltd.) equipped with a combination column of both JAIGEL-1H (20 x 600 mm) and JAIGEL-2H (20 x 600 mm): flow, 3.5 ml/min (CHCl<sub>3</sub>); detection, UV (254 nm) and/or RI (Refractive Index).

**Scheme S-1.** Synthetic route to hosts **4** and **5**.

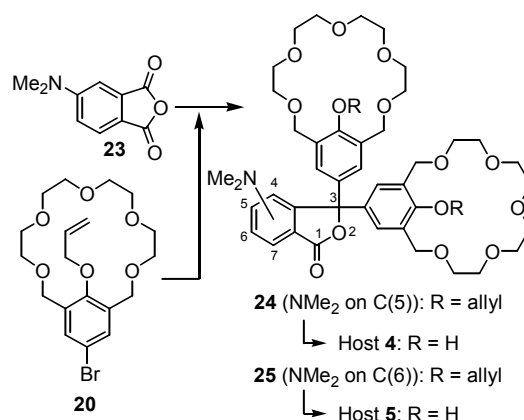

**Compounds 24 and 25:** Compounds **24** and **25** have been synthesized similar to compounds **21** and **22**. Compound **23** is known (Vazquez, M. E.; Rothaman, D. M.; Imperiali, B. *Org. Biomol. Chem.* **2004**, *2*, 1965-1966.)

**24:** 58% yield, White solid;  $R_f = 0.27$  (EtOAc-EtOH, 10:1); m.p. 79-80 °C (from MeOH); IR (KBr) 3502, 2872, 1749, 1604, 1523, 1477, 1352, 1295, 1252, 1110, 1025, 981, 945  $\text{cm}^{-1}$ ;  $^1\text{H-NMR}$  (400 MHz,  $\text{CDCl}_3$ )  $\delta$  7.73 (d,  $J = 8.8$  Hz, 1H), 7.26 (dd,  $J = 12.4, 2.4$  Hz, 4H), 6.79 (dd,  $J = 8.8, 2.0$  Hz, 1H), 6.57 (d,  $J = 2.0$  Hz, 1H), 6.25-6.12 (m, 2H), 5.50 (dd,  $J = 17.6, 2.0$  Hz, 2H), 5.21 (dd,  $J = 10.8, 2.0$  Hz, 2H), 4.98-4.91 (m, 4H), 4.49 (ABq,  $\Delta\nu = 316$  Hz,  $J_{AB} = 10.4$  Hz, 4H), 3.67-3.35 (m, 32H+6H), 3.07 (s, 6H), 2.03 (s, 2H,  $\text{D}_2\text{O}$  exchangeable);  $^{13}\text{C-NMR}$  (100 MHz,  $\text{CDCl}_3$ )  $\delta$  170.4, 159.0, 155.0, 154.5, 136.3, 135.8, 132.19, 132.16, 131.6, 131.0, 126.9, 115.2, 113.0, 112.0, 14.8, 90.0, 70.8, 70.3, 70.2, 70.10, 70.07, 69.2, 68.6, 68.4, 40.5; MS (FAB+, NBA)  $m/z$  (rel. intensity) = 916 [(M+K)<sup>+</sup>, 10], 900 [(M+Na)<sup>+</sup>, 100], 878 [(M+H)<sup>+</sup>, 15]; HRMS (FAB+, NBA) Calcd for  $\text{C}_{48}\text{H}_{64}\text{O}_{14}\text{N}$  (M+H)<sup>+</sup> 878.4327, Found 878.4341; *Anal.* Calcd for  $\text{C}_{48}\text{H}_{63}\text{O}_{14}\text{N}\cdot 2.0 \text{H}_2\text{O}$ : C, 63.07; H, 7.39; N, 1.53. Found: C, 63.21; H, 7.17; N, 1.40.

**25:** 39% yield, White powder;  $R_f = 0.35$  (EtOAc-EtOH, 10:1); m.p. 86-87 °C (from MeOH); IR (KBr) 3503, 2872, 1765, 1625, 1516, 1474, 1352, 1249, 1110, 1023, 947  $\text{cm}^{-1}$ ;  $^1\text{H-NMR}$  (400 MHz,  $\text{CDCl}_3$ )  $\delta$  7.37 (d,  $J = 8.8$  Hz, 1H), 7.23 (dd,  $J = 11.2, 2.4$  Hz, 4H), 7.12 (d,  $J = 2.4$  Hz, 1H), 7.08 (dd,  $J = 8.8, 2.4$  Hz, 1H), 6.25-6.12 (m, 2H), 5.50 (dd,  $J = 17.2, 2.0$  Hz, 2H), 5.21 (dd,  $J = 10.4, 2.0$  Hz, 2H), 4.91 (d,  $J = 5.2$  Hz, 4H), 4.50 (ABq,  $\Delta\nu = 313$  Hz,  $J_{AB} = 10.4$  Hz, 4H), 4.48 (ABq,  $\Delta\nu = 311$  Hz,  $J_{AB} = 10.4$  Hz, 4H), 3.66-3.35 (m, 32H), 3.04 (s, 6H), 2.20 (s, 2H,  $\text{D}_2\text{O}$  exchangeable);  $^{13}\text{C-NMR}$  (100 MHz,  $\text{CDCl}_3$ )  $\delta$  170.9, 158.8, 151.3, 139.8, 136.3, 136.0, 132.22, 132.17, 131.1, 130.9, 126.4, 124.4, 119.1, 115.1, 106.9, 90.9, 70.7, 70.3, 70.2, 70.1, 69.19, 69.17, 68.7, 68.6, 40.6; MS (FAB+, NBA)  $m/z$  (rel. intensity) = 916 [(M+K)<sup>+</sup>, 10], 900 [(M+Na)<sup>+</sup>, 30]; HRMS (FAB+, NBA) Calcd for  $\text{C}_{48}\text{H}_{63}\text{O}_{14}\text{NNa}$  (M+Na)<sup>+</sup> 900.4146, Found 900.4128; *Anal.* Calcd for  $\text{C}_{48}\text{H}_{63}\text{O}_{14}\text{N}\cdot 2.0 \text{H}_2\text{O}$ : C, 63.07;

H, 7.39; N, 1.53. Found: C, 63.26; H, 7.21; N, 1.50.

**Host 4:** Host 4 has been synthesized similar to host 2.

Host 4: 90% yield, Pale yellow foam;  $R_f = 0.32$  (CHCl<sub>3</sub>-MeOH, 10:1); IR (neat) 3350, 2872, 1743, 1604, 1521, 1485, 1355, 1294, 1107 cm<sup>-1</sup>; <sup>1</sup>H-NMR (400 MHz, CDCl<sub>3</sub>)  $\delta$  8.16 (s, 2H), 7.69 (d,  $J = 8.8$  Hz, 1H), 7.08 (s, 4H), 6.74 (dd,  $J = 8.8, 2.0$  Hz, 4H), 6.47 (d,  $J = 2.0$  Hz, 1H), 4.58 (AB,  $\Delta\nu = 0$  Hz,  $J_{AB} = 11.2$  Hz, 8H), 3.78-3.58 (m, 32H), 3.05 (s, 6H); <sup>13</sup>C-NMR (100 MHz, CDCl<sub>3</sub>)  $\delta$  170.4, 156.0, 155.1, 154.3, 132.2, 128.8, 126.8, 124.3, 112.8, 112.2, 104.9, 90.6, 70.6, 70.5, 70.3, 70.0, 69.4, 40.5; MS (FAB+, Glycerol)  $m/z$  (rel. intensity) = 842 [(M+2Na-H)<sup>+</sup>, 10], 836 [(M+K)<sup>+</sup>, 15], 820 [(M+Na)<sup>+</sup>, 100], 798 [(M+H)<sup>+</sup>, 45]; HRMS (FAB+, NBA) Calcd for C<sub>42</sub>H<sub>56</sub>O<sub>14</sub>N (M+H)<sup>+</sup> 798.3701, Found 798.3707; *Anal.* Calcd for C<sub>48</sub>H<sub>63</sub>O<sub>14</sub>N·1.0 H<sub>2</sub>O: C, 61.83; H, 7.04; N, 1.72. Found: C, 61.85; H, 6.82; N, 1.79.

**Host 5:** Host 5 has been synthesized similar to host 2.

Host 5: 90% yield, Pale yellow foam;  $R_f = 0.33$  (CHCl<sub>3</sub>-MeOH, 10:1); IR (neat) 3344, 2872, 1757, 1686, 1619, 1514, 1485, 1356, 1248, 1107, 943 cm<sup>-1</sup>; <sup>1</sup>H-NMR (400 MHz, CDCl<sub>3</sub>)  $\delta$  8.25 (s, 2H), 7.30 (d,  $J = 8.8$  Hz, 1H), 7.08 (d,  $J = 2.4$  Hz, 4H), 7.00 (dd,  $J = 8.8, 2.4$  Hz, 1H), 4.57 (AB,  $\Delta\nu = 0$  Hz,  $J_{AB} = 11.2$  Hz, 8H), 3.76-3.58 (m, 32H), 3.02 (s, 6H); <sup>13</sup>C-NMR (100 MHz, CDCl<sub>3</sub>)  $\delta$  171.0, 156.0, 151.2, 140.1, 132.5, 128.7, 126.4, 124.6, 124.4, 118.8, 106.9, 91.4, 70.62, 70.55, 70.3, 70.0, 69.4, 40.6; MS (FAB+, Glycerol)  $m/z$  (rel. intensity) = 820 [(M+Na)<sup>+</sup>, 10], 798 [(M+H)<sup>+</sup>, 35], 737 (10), 645 (20), 553 (35), 369 (20); HRMS (FAB+, Glycerol) Calcd for C<sub>42</sub>H<sub>56</sub>O<sub>14</sub>N (M+H)<sup>+</sup> 798.3701, Found 798.3696; *Anal.* Calcd for C<sub>48</sub>H<sub>63</sub>O<sub>14</sub>N·2.0 H<sub>2</sub>O: C, 60.49; H, 7.13; N, 1.68. Found: C, 60.80; H, 6.88; N, 1.66.

**Scheme S-2.** Synthetic route to host **6**.

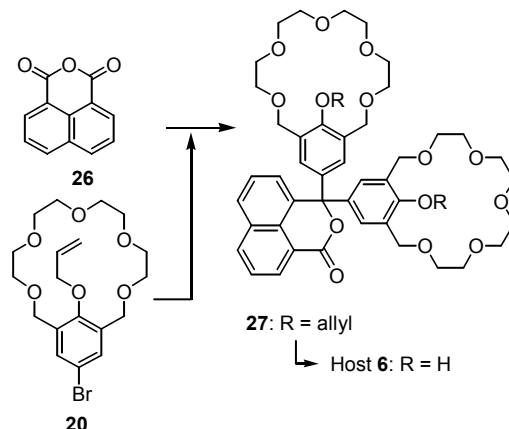

**Compound 27:** Compound **27** has been synthesized similar to compounds **21** and **22**.

**27:** 61% yield, White powder;  $R_f = 0.30$  (AcOEt-MeOH, 10:1); m.p. 142-143 °C; IR (KBr) 2360, 1721, 1644, 1585, 1477, 1137, 1110  $\text{cm}^{-1}$ ;  $\delta$  8.42 (d,  $J = 7.3$  Hz, 1H), 8.17 (d,  $J = 7.3$  Hz, 1H), 7.94 (d,  $J = 7.3$  Hz, 1H), 7.67 (dd,  $J = 7.3, 7.3$  Hz, 1H), 7.60 (dd,  $J = 7.3, 7.3$  Hz, 1H), 7.23 (d,  $J = 7.3$  Hz, 1H), 7.09 (dd,  $J = 36.2, 2.3$  Hz, 4H), 6.24-6.11 (m, 2H), 5.49 (dd,  $J = 17.4, 2.3$  Hz, 2H), 5.21 (dd,  $J = 10.5, 2.3$  Hz, 2H), 4.94 (d,  $J = 4.1$  Hz, 4H), 4.43 (ABq,  $\Delta\nu = 302$  Hz,  $J_{AB} = 10.6$  Hz, 4H), 4.44 (ABq,  $\Delta\nu = 329$  Hz,  $J_{AB} = 10.6$  Hz, 4H), 3.63-3.30 (m, 32H);  $^{13}\text{C-NMR}$  (100 MHz,  $\text{CDCl}_3$ )  $\delta$  165.2, 159.2, 138.3, 136.7, 134.4, 134.3, 132.7, 132.4, 132.4, 130.4, 128.8, 128.3, 128.2, 126.9, 126.7, 121.7, 115.4, 90.7, 71.2, 70.7, 70.6, 69.7, 69.1, 69.0; MS (FAB+, NBA)  $m/z$  (rel. intensity) = 907 [(M+Na) $^+$ , 100], 465 (30); HRMS (FAB+, NBA) Calcd for  $\text{C}_{50}\text{H}_{60}\text{O}_{14}\text{Na}$  (M+Na) $^+$  907.3881, Found 907.3870; *Anal.* Calcd for  $\text{C}_{50}\text{H}_{60}\text{O}_{14}$ : C, 67.86; H, 6.83. Found: C, 67.89; H, 6.91.

**Host 6:** Host **6** has been synthesized similar to host **2**.

**Host 6:** 44% yield, White powder;  $R_f = 0.28$  ( $\text{CHCl}_3$ -MeOH, 10:1); m.p. 175-176 °C; IR (KBr) 3344, 2870, 1716, 1608, 1486, 1353, 1139, 1108  $\text{cm}^{-1}$ ;  $^1\text{H-NMR}$  (400 MHz,  $\text{CDCl}_3$ )  $\delta$  8.37 (d,  $J = 6.9$  Hz, 1H), 8.19 (brs, 2H), 7.64 (d,  $J = 8.2$  Hz, 1H), 7.63 (dd,  $J = 8.2, 8.2$  Hz, 1H), 7.50 (dd,  $J = 8.2, 8.2$  Hz, 1H), 7.09 (d,  $J = 6.9$  Hz, 1H), 6.90 (s, 4H), 4.53 (AB,  $\Delta\nu = 0$  Hz,  $J_{AB} = 11.4$  Hz, 8H), 3.80-3.59 (m, 32H);  $^{13}\text{C-NMR}$  (100 MHz,  $\text{CDCl}_3$ )  $\delta$  165.4, 156.4, 134.5, 134.2, 132.5, 129.8, 128.6, 128.0, 127.9, 126.6, 126.3, 124.2, 121.6, 90.8, 71.0, 70.9, 70.6, 70.1, 69.7; MS (FAB+, NBA)  $m/z$  (rel. intensity) = 827 [(M+Na) $^+$ , 40], 805 [(M+H) $^+$ , 10], 154 (100); HRMS (FAB+, NBA) Calcd for  $\text{C}_{44}\text{H}_{53}\text{O}_{14}$  (M+H) $^+$  805.3436, Found 805.3444; *Anal.* Calcd for  $\text{C}_{44}\text{H}_{52}\text{O}_{14} \cdot 0.5 \text{H}_2\text{O}$ : C, 64.93; H, 6.56. Found: C, 65.10; H, 6.50.

**Scheme S-3.** Synthetic route to host **7**.

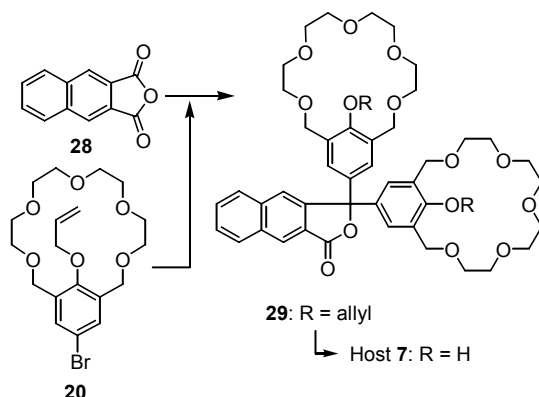

**Compound 29:** Compound **29** has been synthesized similar to compounds **21** and **22**.

**29:** 95% yield, White powder,  $R_f = 0.41$  (EtOAc-acetone, 4:1); m.p. 77-78 °C; IR (KBr) 2871, 1766, 1636, 1479, 1351  $\text{cm}^{-1}$ ;  $^1\text{H-NMR}$  (400 MHz,  $\text{CDCl}_3$ )  $\delta$  8.53 (s, 1H), 8.07 (d,  $J = 8.2$  Hz, 1H), 7.97 (d,  $J = 8.2$  Hz, 1H), 7.96 (s, 1H), 7.67 (dd,  $J = 7.3, 7.3$  Hz, 1H), 7.61 (dd,  $J = 7.3, 7.3$  Hz, 1H), 7.30 (dd,  $J = 15.6, 2.8$  Hz, 4H), 6.25-6.12 (m, 2H), 5.50 (dd,  $J = 17.4, 1.8$  Hz, 2H), 5.21 (d,  $J = 17.4$  Hz, 2H), 4.94 (d,  $J = 5.0$  Hz, 4H), 4.87 (dd,  $J = 10.14, 1.8$  Hz, 4H), 4.10 (dd,  $J = 10.14, 2.8$  Hz, 4H), 3.70-3.32 (m, 32H);  $^{13}\text{C-NMR}$  (100 MHz,  $\text{CDCl}_3$ )  $\delta$  170.2, 159.6, 145.3, 136.8, 136.7, 136.1, 133.7, 133.0, 132.9, 131.6, 131.5, 130.3, 129.5, 129.3, 127.9, 127.7, 123.9, 115.5, 91.9, 71.2, 70.7, 70.6, 69.6, 69.2; MS (FAB+, NBA)  $m/z$  (rel. intensity) = 907 [(M+Na) $^+$ , 100], 885 [(M+H) $^+$ , 30], 499 (25); HRMS (FAB+) Calcd for  $\text{C}_{50}\text{H}_{61}\text{O}_{14}$  (M+H) $^+$  885.4061, Found 885.4059; Anal. Calcd for  $\text{C}_{50}\text{H}_{60}\text{O}_{14}\cdot\text{H}_2\text{O}$ : C, 66.50; H, 6.92. Found: C, 66.84; H, 6.89.

**Host 7:** Host **7** has been synthesized similar to host **2**.

**Host 7:** 69% yield, White powder;  $R_f = 0.33$  ( $\text{CHCl}_3$ -MeOH, 10:1); m.p. 199-201 °C; IR (KBr) 3339, 2870, 1762, 1609, 1486, 1355  $\text{cm}^{-1}$ ;  $^1\text{H-NMR}$  (400 MHz,  $\text{CDCl}_3$ )  $\delta$  8.48 (s, 1H), 8.4-8.1 (brs, 2H), 8.04 (d,  $J = 8.2$  Hz, 1H), 7.94 (d,  $J = 8.3$  Hz, 1H), 7.88 (s, 1H), 7.65 (dd,  $J = 7.3, 7.3$  Hz, 1H), 7.58 (dd,  $J = 7.3, 7.3$  Hz, 1H), 7.12 (s, 4H), 4.58 (AB,  $\Delta\nu = 0$  Hz,  $J_{\text{AB}} = 11.0$  Hz, 8H), 3.70-3.55 (m, 32H);  $^{13}\text{C-NMR}$  (100 MHz,  $\text{CDCl}_3$ )  $\delta$  170.3, 156.7, 146.5, 136.6, 133.5, 132.5, 130.2, 129.4, 129.2, 129.1, 127.7, 127.5, 125.0, 124.1, 123.7, 92.4, 71.1, 71.0, 70.7, 70.4, 69.9; MS (FAB+, NBA)  $m/z$  (rel. intensity) = 827 [(M+Na) $^+$ , 100], 805 [(M+H) $^+$ , 15], 307 (60); HRMS (FAB+, Glycerol) Calcd for  $\text{C}_{44}\text{H}_{53}\text{O}_{14}$  (M+H) $^+$  804.3435, Found 804.3424; Anal. Calcd for  $\text{C}_{44}\text{H}_{52}\text{O}_{14}$ : C, 65.66; H, 6.51. Found: C, 65.29; H, 6.67.

**Scheme S-4.** Synthetic route to host **8**.

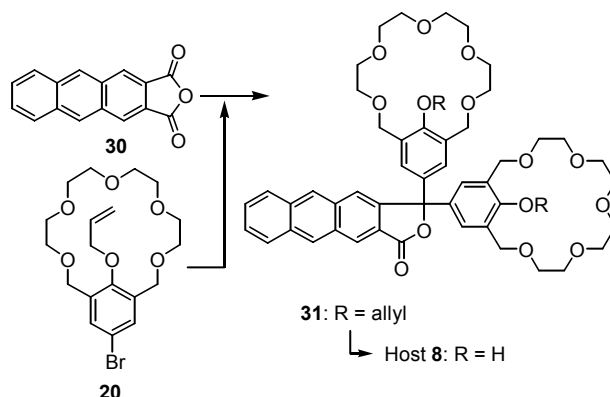

**Compound 31:** Compound **31** has been synthesized similar to compounds **21** and **22**.

**31:** 93% yield, pale yellow powder,  $R_f = 0.33$  (EtOAc-MeOH, 10:1); m.p. 90-91 °C; IR (KBr) 2871, 1764, 1638, 1213, 1112  $\text{cm}^{-1}$ ;  $^1\text{H-NMR}$  (400 MHz,  $\text{CDCl}_3$ )  $\delta$  8.75 (s, 1H), 8.71 (s, 1H), 8.58 (s, 1H), 8.10 (s, 1H), 8.09-8.01 (m, 2H), 7.59-7.51 (m, 2H), 7.33 (dd,  $J = 16.0, 2.3$  Hz, 4H), 6.23-6.14 (m, 2H), 5.50 (dd,  $J = 17.4, 2.3$  Hz, 2H), 5.21 (dd,  $J = 10.6, 2.3$  Hz, 2H), 4.95 (d,  $J = 5.0$  Hz, 4H), 4.49 (ABq,  $\Delta\nu = 305$  Hz,  $J_{\text{AB}} = 10.1$  Hz, 4H), 4.49 (ABq,  $\Delta\nu = 309$  Hz,  $J_{\text{AB}} = 10.1$  Hz, 4H), 3.66-3.33 (m, 32H);  $^{13}\text{C-NMR}$  (100 MHz,  $\text{CDCl}_3$ )  $\delta$  170.0, 159.6, 144.1, 136.8, 136.3, 133.9, 133.5, 132.9, 132.6, 131.7, 131.5, 131.2, 130.0, 129.3, 128.9, 128.6, 127.9, 127.6, 126.8, 124.1, 123.8, 115.5, 91.9, 71.2, 70.7, 70.6, 70.5, 69.6, 69.2; MS (FAB+, NBA)  $m/z$  (rel. intensity) = 957 [(M+Na) $^+$ , 100], 935 [(M+H) $^+$ , 15], 307 (20); HRMS (FAB+) Calcd for  $\text{C}_{54}\text{H}_{63}\text{O}_{14}$  (M+H) $^+$  935.4218, Found 935.4245; Anal. Calcd for  $\text{C}_{54}\text{H}_{62}\text{O}_{14} \cdot 0.5\text{H}_2\text{O}$ : C, 68.70; H, 6.73. Found: C, 68.92; H, 6.72.

**Host 8:** Host **8** has been synthesized similar to host **2**.

Host **8:** 64% yield, White powder;  $R_f = 0.30$  ( $\text{CHCl}_3$ -MeOH, 10:1); m.p. 191- °C (decomp.); IR (KBr) 3357, 2871, 1761, 1637, 1486, 1355  $\text{cm}^{-1}$ ;  $^1\text{H-NMR}$  (400 MHz,  $\text{CDCl}_3$ )  $\delta$  8.70 (s, 1H), 8.68 (s, 1H), 8.53 (s, 1H), 8.20 (s, 2H, OH), 8.1-8.0 (m, 2H), 8.01 (s, 1H), 7.6-7.5 (m, 2H), 7.15 (s, 4H), 4.58 (AB,  $\Delta\nu = 16$  Hz,  $J_{\text{AB}} = 5.5$  Hz, 8H), 3.75-3.6 (m, 32H);  $^{13}\text{C-NMR}$  (100 MHz,  $\text{CDCl}_3$ )  $\delta$  170.1, 157.1, 156.6, 144.3, 133.8, 133.3, 132.7, 132.5, 131.0, 129.8, 129.1, 128.9, 128.8, 128.5, 127.7, 127.5, 126.8, 125.5, 125.0, 123.9, 123.8, 92.4, 71.0, 71.0, 70.8, 70.7, 70.3, 69.9; MS (FAB+, NBA)  $m/z$  (rel. intensity) = 877 [(M+Na) $^+$ , 2], 460 (4) 154 (100); HRMS (FAB+, NBA) Calcd for  $\text{C}_{48}\text{H}_{54}\text{O}_{14}\text{Na}$  (M+Na) $^+$  877.3412, Found 877.3391; Anal. Calcd for  $\text{C}_{48}\text{H}_{54}\text{O}_{14} \cdot 0.15\text{CHCl}_3$ : C, 66.26; H, 6.25. Found: C, 66.29; H, 6.19.

DF: FILE C:\WINNMR\DATA\k4ht1203r1hf. a1s  
 CONVAT DT1203-RI (FMC-3). 1H  
 DATA Thu Oct 26 09:02:19 2006  
 EXPTNO 1  
 PROCNO 1  
 F2 -  
 F3 -  
 F4 -  
 F5 -  
 F6 -  
 F7 -  
 F8 -  
 F9 -  
 F10 -  
 F11 -  
 F12 -  
 F13 -  
 F14 -  
 F15 -  
 F16 -  
 F17 -  
 F18 -  
 F19 -  
 F20 -  
 F21 -  
 F22 -  
 F23 -  
 F24 -  
 F25 -  
 F26 -  
 F27 -  
 F28 -  
 F29 -  
 F30 -  
 F31 -  
 F32 -  
 F33 -  
 F34 -  
 F35 -  
 F36 -  
 F37 -  
 F38 -  
 F39 -  
 F40 -  
 F41 -  
 F42 -  
 F43 -  
 F44 -  
 F45 -  
 F46 -  
 F47 -  
 F48 -  
 F49 -  
 F50 -  
 F51 -  
 F52 -  
 F53 -  
 F54 -  
 F55 -  
 F56 -  
 F57 -  
 F58 -  
 F59 -  
 F60 -  
 F61 -  
 F62 -  
 F63 -  
 F64 -  
 F65 -  
 F66 -  
 F67 -  
 F68 -  
 F69 -  
 F70 -  
 F71 -  
 F72 -  
 F73 -  
 F74 -  
 F75 -  
 F76 -  
 F77 -  
 F78 -  
 F79 -  
 F80 -  
 F81 -  
 F82 -  
 F83 -  
 F84 -  
 F85 -  
 F86 -  
 F87 -  
 F88 -  
 F89 -  
 F90 -  
 F91 -  
 F92 -  
 F93 -  
 F94 -  
 F95 -  
 F96 -  
 F97 -  
 F98 -  
 F99 -  
 F100 -

FWC-3 (F<sub>10m</sub>A<sub>10</sub>F<sub>1</sub>)

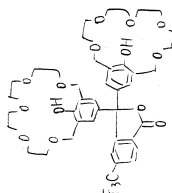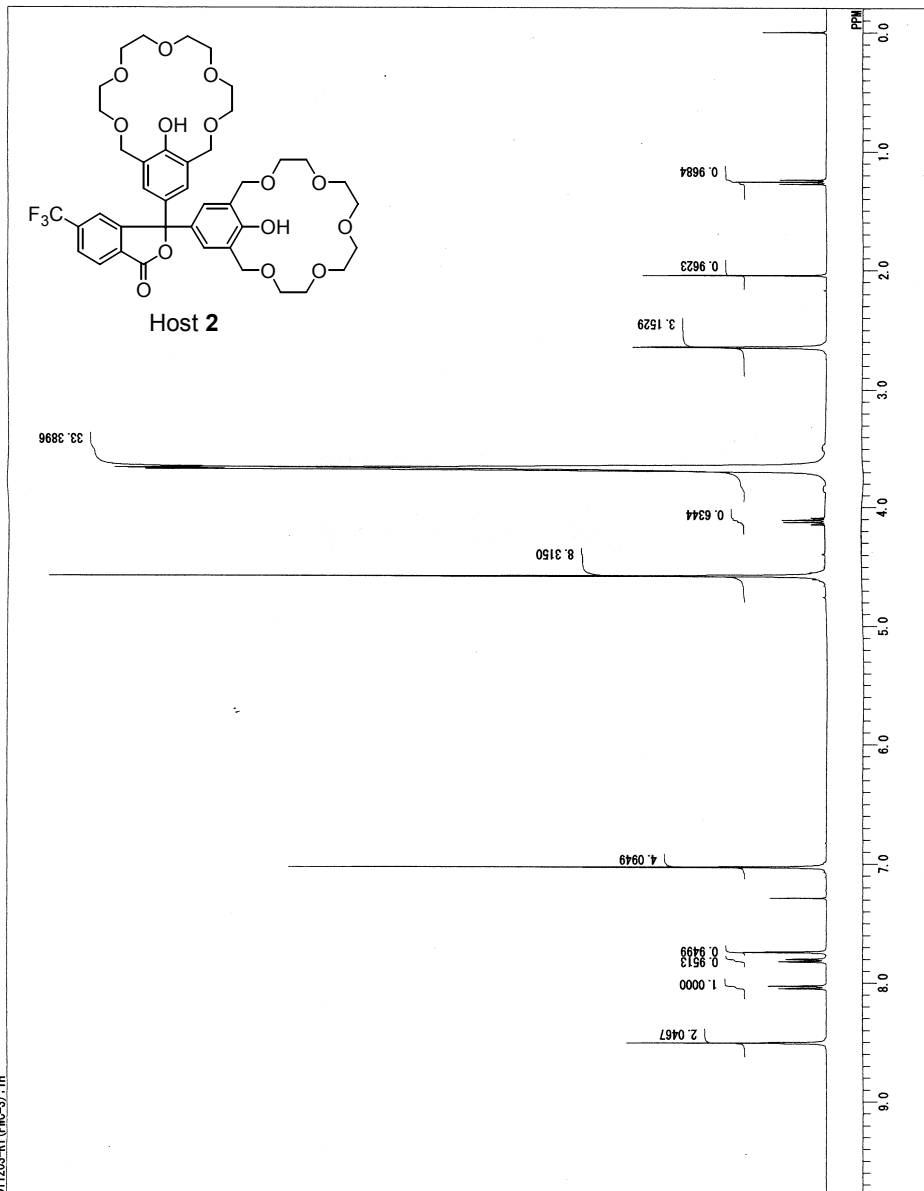

C:\WINNMR\DATA\k4ht1203r1hf. a1s  
 DT1203-RI (FMC-3). 1H





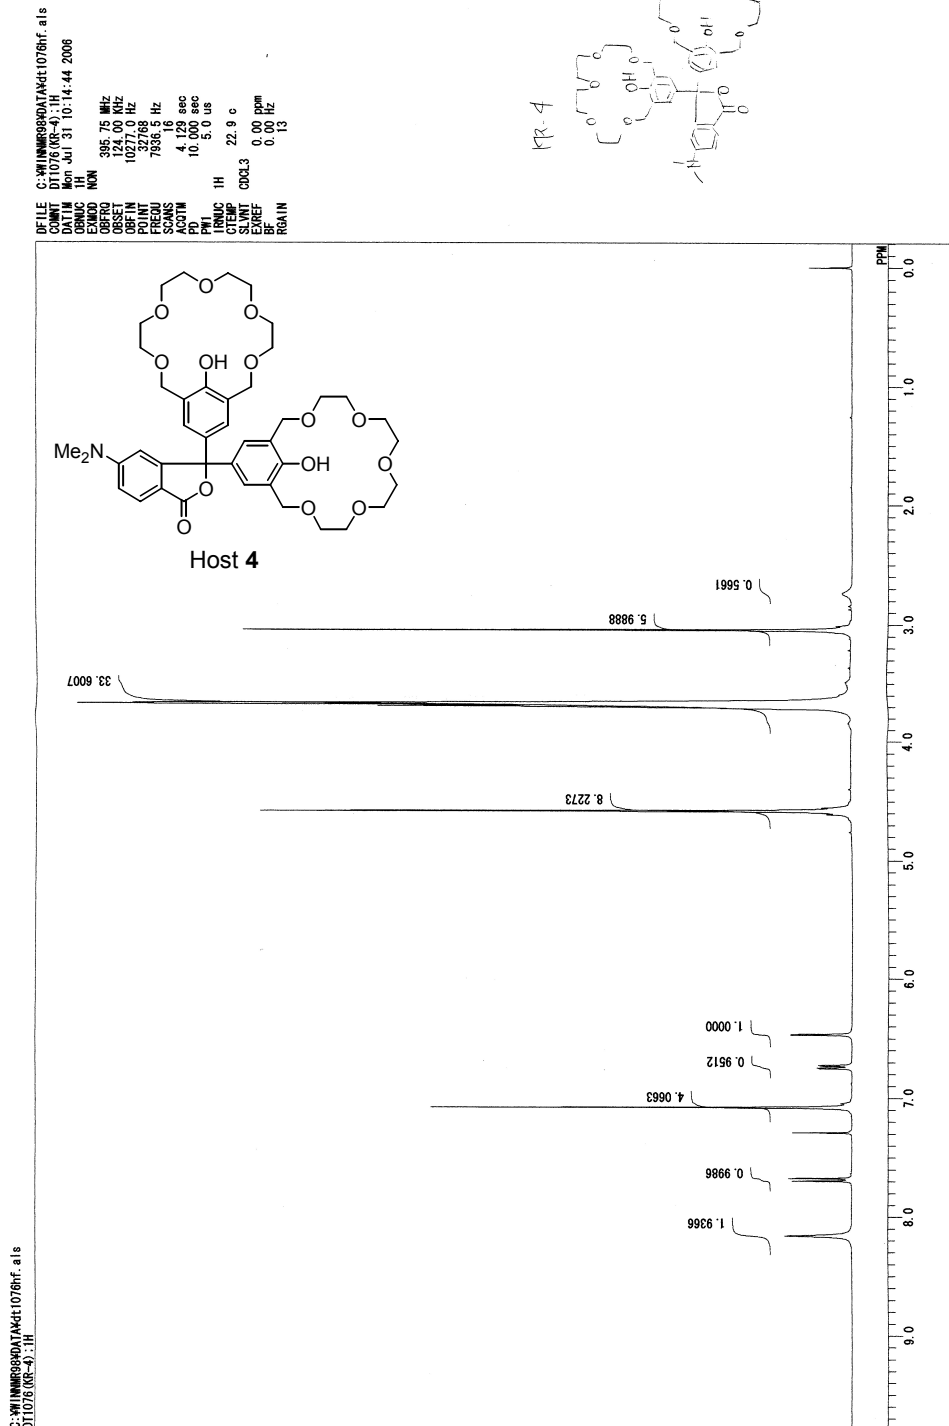

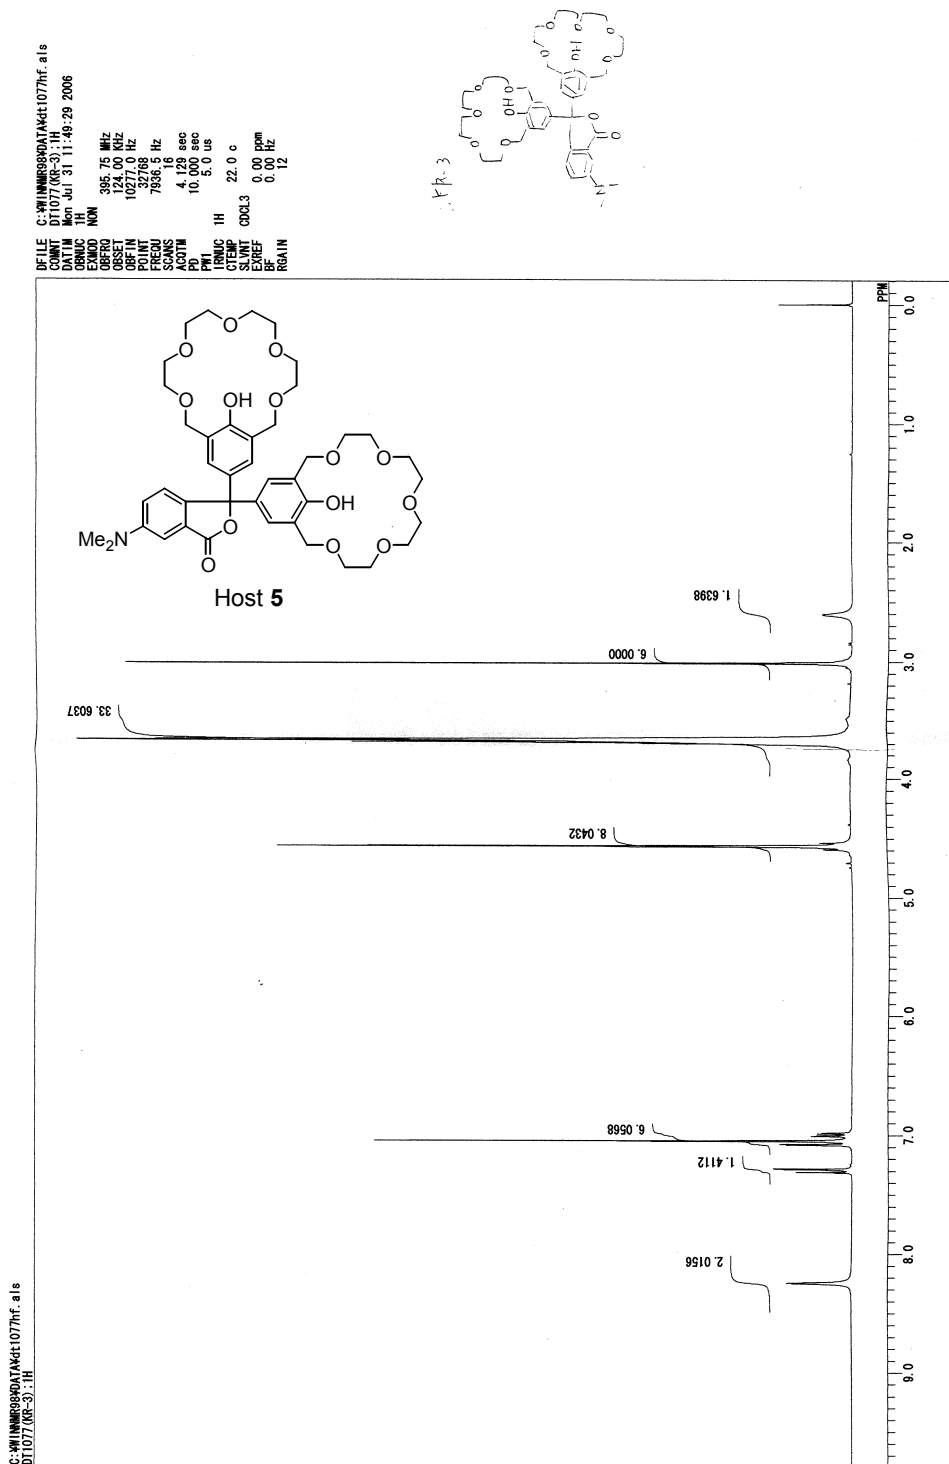





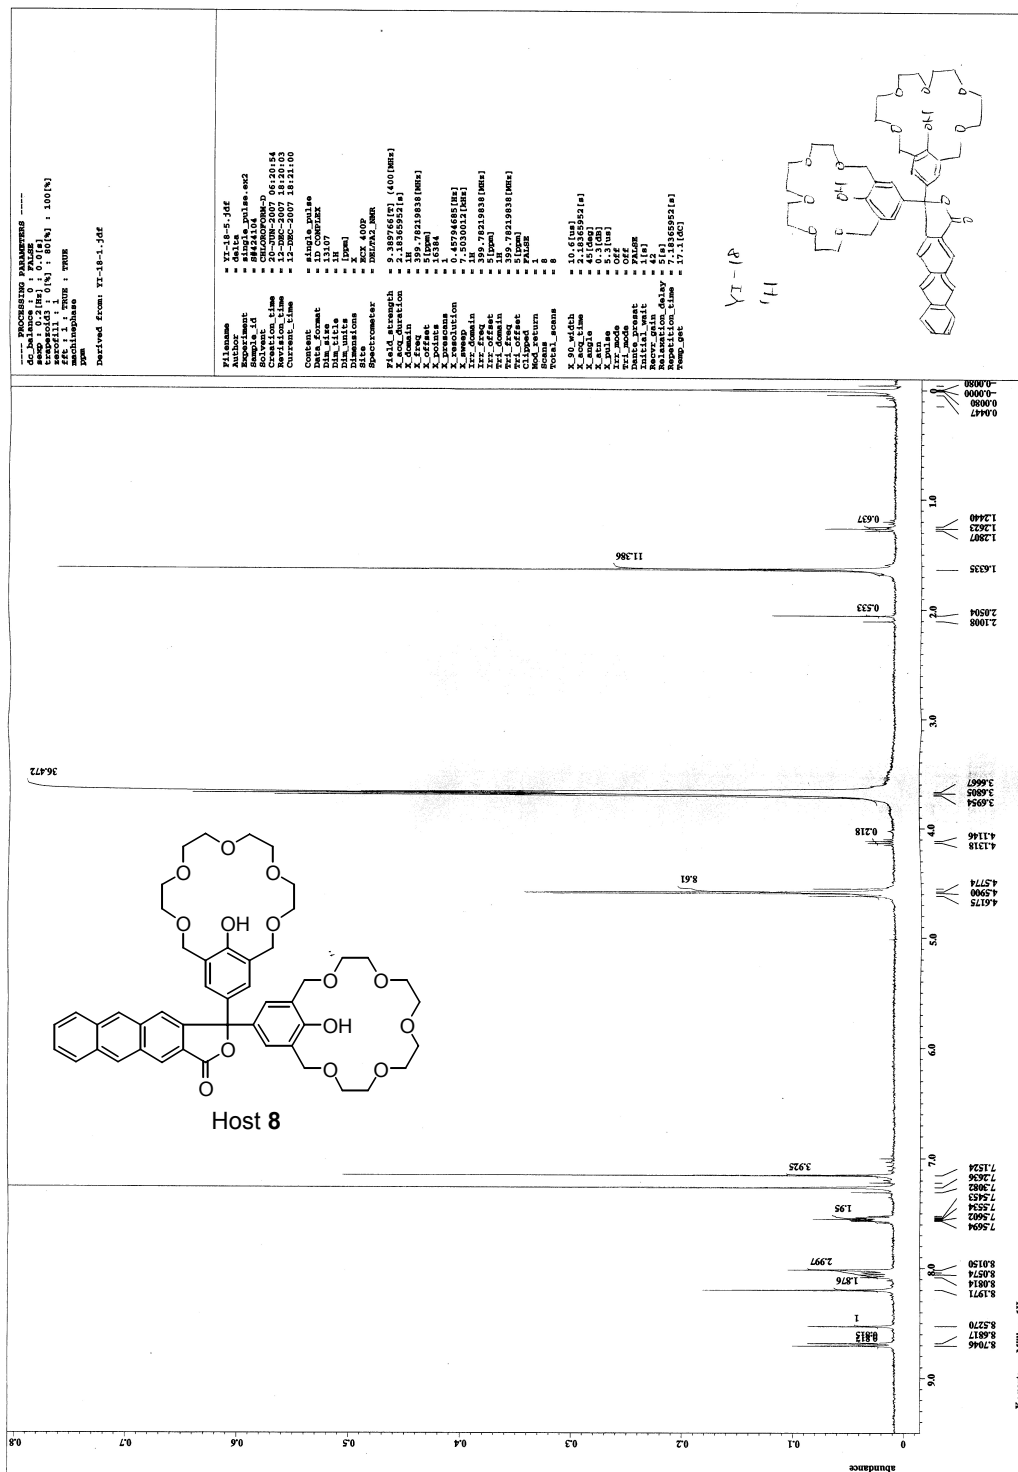

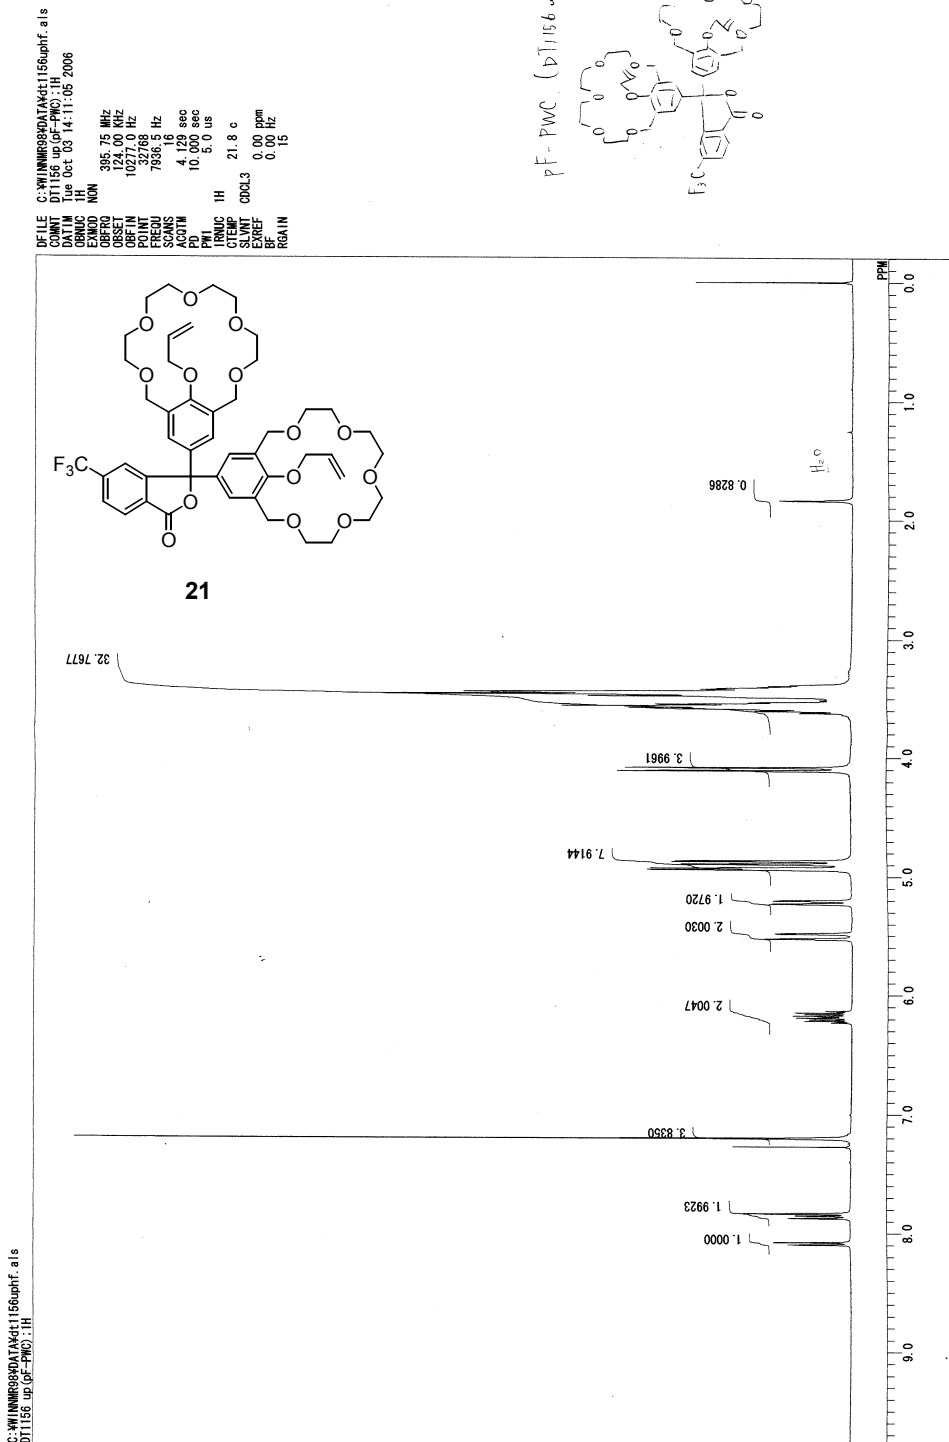

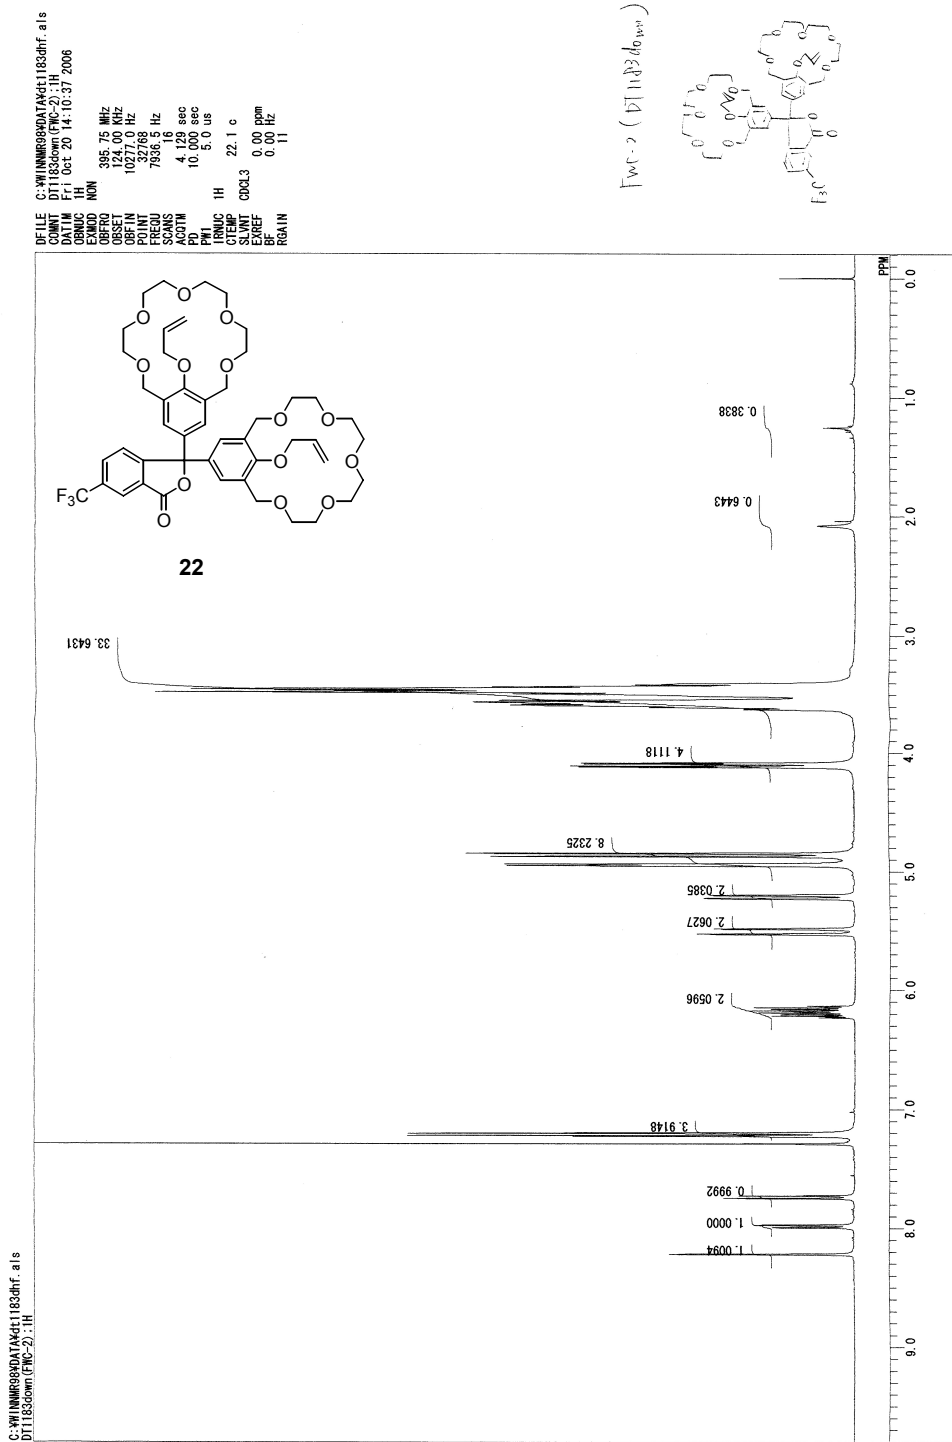



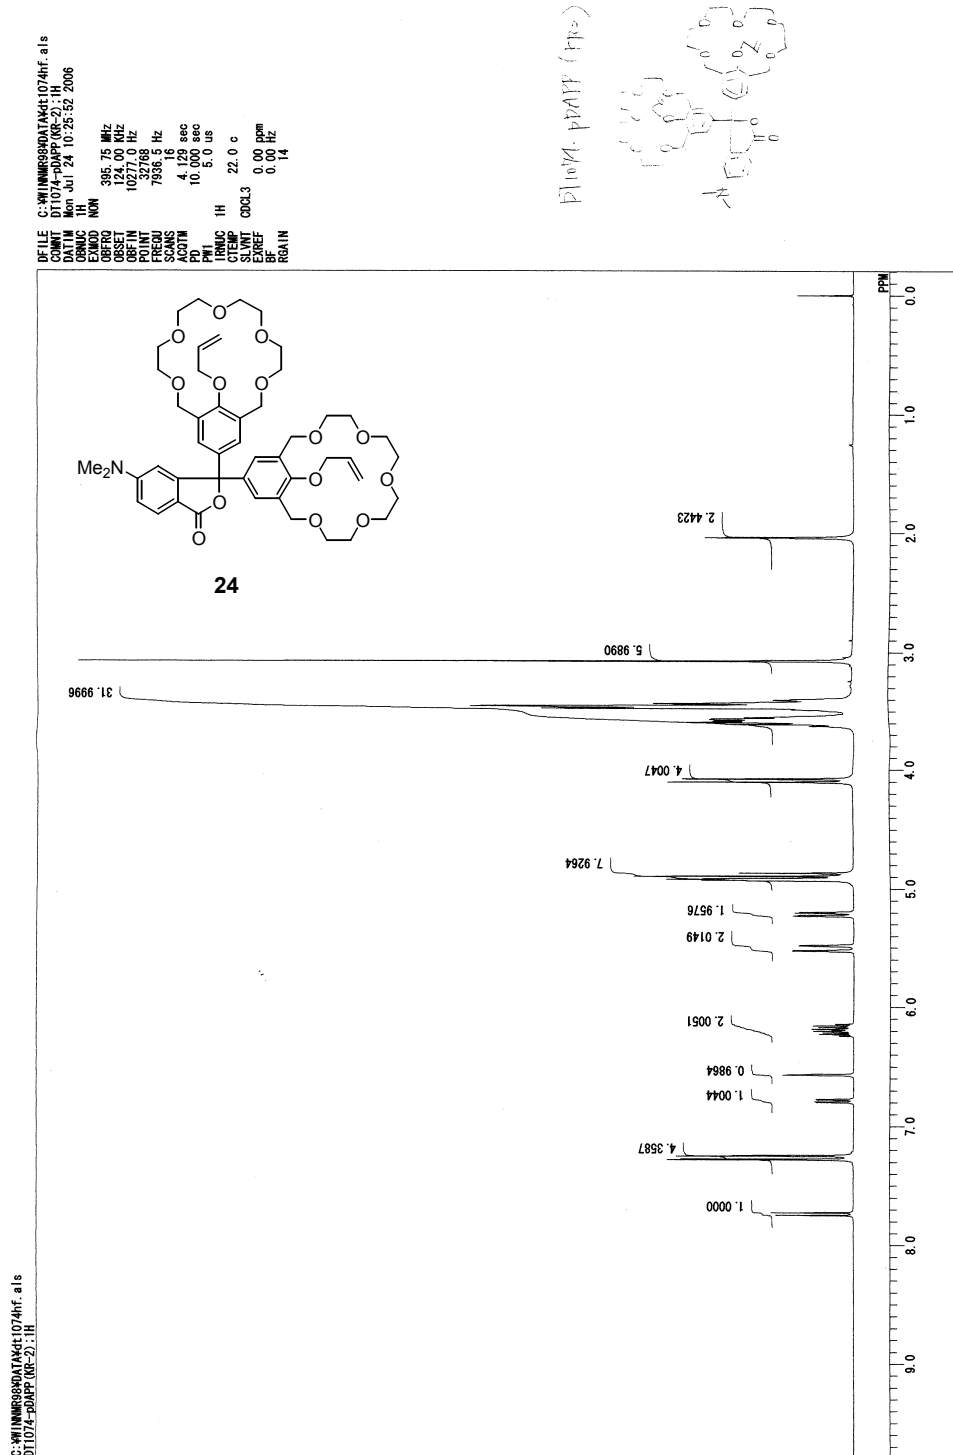

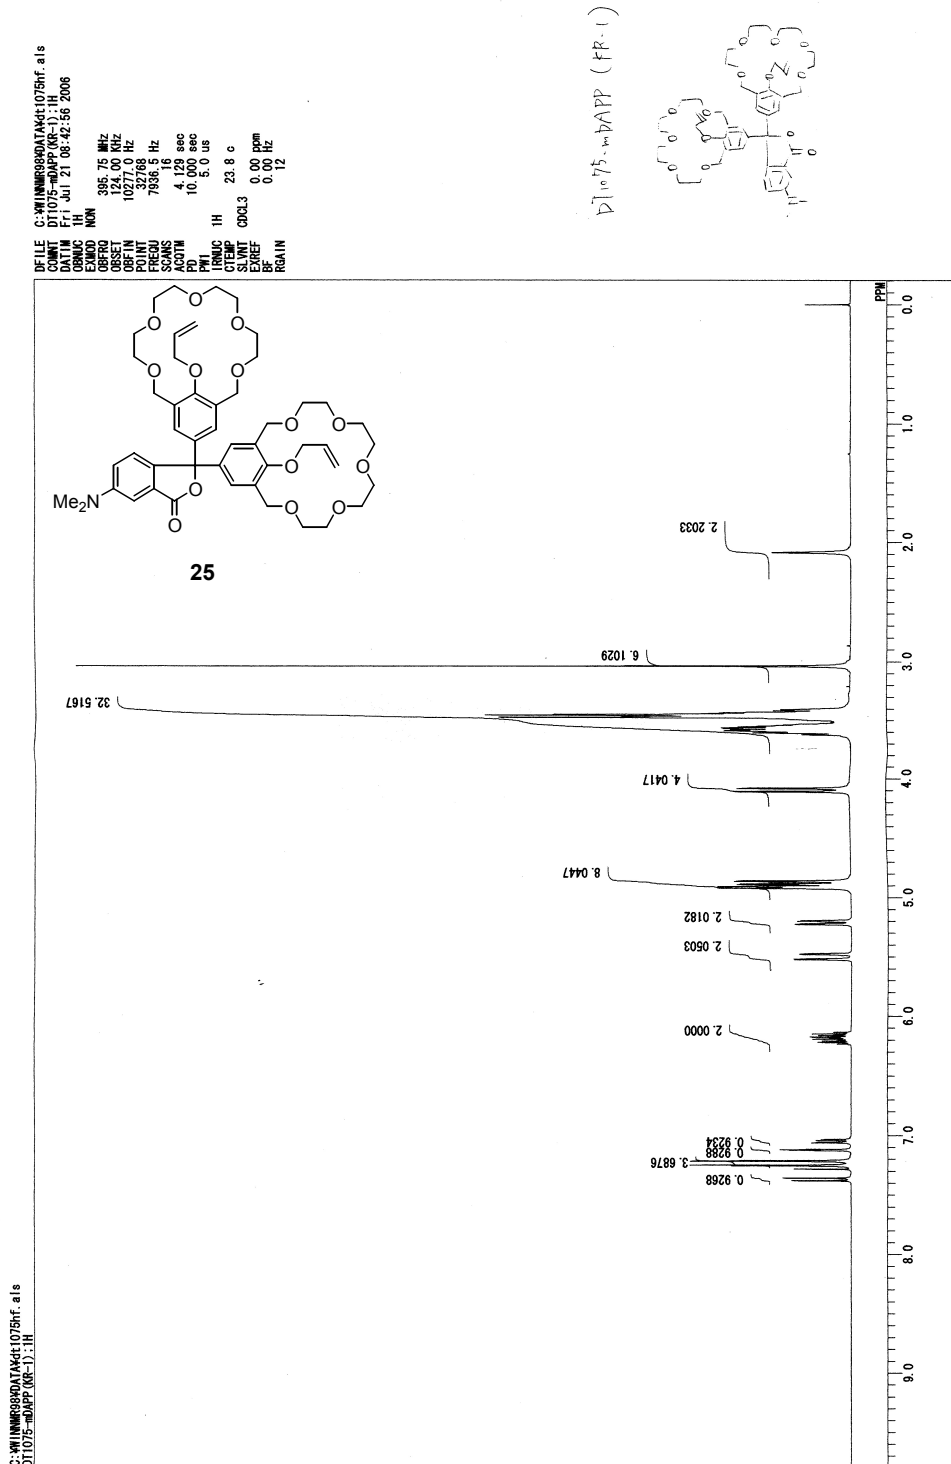

Supplement: b909682e.pdf [file b909682e.pdf]
